# Supplementary material
Source: publisher site journal article supplement (https://mbmg.pensoft.net/article/download/suppl/3916255/)
Supplement: Supplementary file 1

**Supplementary Table 4.** Species level taxa (GenBank Data), at 3 minimum read depth. Underlined taxa were changed based on the distribution of taxa in the study zone:

| Merino Only | Dorper Only | Goat Only | Dorper and Merino | Merino and Goat | Dorper and Goat | Dorper, Merino and Goat |
| --- | --- | --- | --- | --- | --- | --- |
| *Alternanthera* sp. | *Boerhavia* sp. | *Chenopodium auricomum* | *Austrostipa nodosa* | *Medicago* *laciniata* | *Erodium cygnorum* | *Austrostipa nitida* |
| *Bergia* sp. | *Enneapogon* sp. | *Haloragis aspera* | *Brachyscome ciliaris* | *Sclerolaena* *obliquicuspis* | *Tetragonia* sp. | *Calotis* sp. |
| *Calotis hispidula* | *Erodium cicutarium* | *Haloragis* sp. | *Euphorbia* sp. |  |  | *Carrichtera annua* |
| *Cullen australasicum* | *Gnephosis arachnoidea* | *Haloragis glauca* | *Lotus* sp. |  |  | *Convolvulus clementii* |
| *Eragrostis* sp. | *Leiocarpa semicalva* | *Maireana brevifolia* | *Maireana* sp. |  |  | *Eucalyptus* sp. |
| *Lotus cruentus* | *Marsilea* sp. |  | *Salvia* sp. |  |  | *Medicago minima* |
| *Maireana coronata* | *Medicago polymorpha* |  | *Vittadinia* *sulcata* |  |  | *Sclerolaena diacantha* |
| *Sclerolaena* sp. 1 | *Minuria cunninghamii* |  |  |  |  | *Sida* *fibulifera* |
| *Sclerolaena* sp. 2 | *Senecio* sp. |  |  |  |  | *Sida* sp. |
| *Sisymbrium* *irio* | *Silene* sp. |  |  |  |  | *Tetragonia* *tetragonioides* |
|  | *Sisymbrium erysimoides* |  |  |  |  | *Vittadinia* *eremaea* |
|  | *Sonchus sp.* |  |  |  |  |  |
|  | *Spergularia tasmanica* |  |  |  |  |  |
